# Supplementary material
Source: HighWire-hosted journal article supplement (doi:10.1101/rna.080576.125)
Supplement: Supplemental_References.docx [file Supplemental_References.docx]

# REFERENCES

Bodenhausen G, Ruben DJ. 1980. Natural abundance nitrogen-15 NMR by enhanced heteronuclear spectroscopy. *Chemical Physics Letters* **69**: 185–189. doi: 10.1016/0009-2614(80)80041-8

Braunschweiler L, Ernst RR. 1983. Coherence transfer by isotropic mixing: Application to proton correlation spectroscopy. *Journal of Magnetic Resonance (1969)* **53**: 521–528. doi: 10.1016/0022-2364(83)90226-3

Dingley AJ, Grzesiek S. 1998. Direct Observation of Hydrogen Bonds in Nucleic Acid Base Pairs by Internucleotide 2JNN Couplings Couplings. *Journal of the American Chemical Society* **120**: 8293–8297. doi: 10.1021/ja981513x

Duchardt E, Schwalbe H. 2005. Residue specific ribose and nucleobase dynamics of the cUUCGg RNA tetraloop motif by NMR 13C relaxation. *Journal of biomolecular NMR* **32**: 295–308. doi: 10.1007/s10858-005-0659-x

Farrow NA, Muhandiram R, Singer AU, Pascal SM, Kay CM, Gish G, Shoelson SE, Pawson T, Forman-Kay JD, Kay LE. 1994. Backbone dynamics of a free and phosphopeptide-complexed Src homology 2 domain studied by 15N NMR relaxation. *Biochemistry* **33**: 5984–6003. doi: 10.1021/bi00185a040

Favier A, Brutscher B. 2011. Recovering lost magnetization: polarization enhancement in biomolecular NMR. *Journal of biomolecular NMR* **49**: 9–15. doi: 10.1007/s10858-010-9461-5

Glaser SJ, Schwalbe H, Marino JP, Griesinger C. 1996. Directed TOCSY, a Method for Selection of Directed Correlations by Optimal Combinations of Isotropic and Longitudinal Mixing. *Journal of Magnetic Resonance, Series B* **112**: 160–180. doi: 10.1006/jmrb.1996.0126

Hwang TL, Shaka AJ. 1995. Water Suppression That Works. Excitation Sculpting Using Arbitrary Wave-Forms and Pulsed-Field Gradients. *Journal of Magnetic Resonance, Series A* **112**: 275–279. doi: 10.1006/jmra.1995.1047

Ikura M, Bax A. 1992. Isotope-Filtered 2D NMR of a Protein-Peptide Complex: Study of a Skeletal Muscle Myosin Light Chain Kinase Fragment Bound to Calmodulin

Kay LE, Xu GY, Singer AU, Muhandiram DR, Formankay JD. 1993. A Gradient-Enhanced HCCH-TOCSY Experiment for Recording Side-Chain 1H and 13C Correlations in H2O Samples of Proteins. *Journal of Magnetic Resonance, Series B* **101**: 333–337. doi: 10.1006/jmrb.1993.1053

Lescop E, Kern T, Brutscher B. 2010. Guidelines for the use of band-selective radiofrequency pulses in hetero-nuclear NMR: Example of longitudinal-relaxation-enhanced BEST-type 1H–15N correlation experiments. *Journal of Magnetic Resonance* **203**: 190–198. doi: 10.1016/j.jmr.2009.12.001

Lescop E, Schanda P, Brutscher B. 2007. A set of BEST triple-resonance experiments for time-optimized protein resonance assignment. *Journal of Magnetic Resonance* **187**: 163–169. doi: 10.1016/j.jmr.2007.04.002

Marino JP, Schwalbe H, Glaser SJ, Griesinger C. 1996. Determination of γ and Stereospecific Assignment of H5‘ Protons by Measurement of 2 *J* and 3 *J* Coupling Constants in Uniformly 13 C Labeled RNA. *Journal of the American Chemical Society* **118**: 4388–4395. doi: 10.1021/ja953554o

Mori S, Abeygunawardana C, Johnson MO, Vanzijl PCM. 1995. Improved Sensitivity of HSQC Spectra of Exchanging Protons at Short Interscan Delays Using a New Fast HSQC (FHSQC) Detection Scheme That Avoids Water Saturation. *Journal of Magnetic Resonance, Series B* **108**: 94–98. doi: 10.1006/jmrb.1995.1109

Mueller L, Legault P, Pardi A. 1995. Improved RNA Structure Determination by Detection of NOE Contacts to Exchange-Broadened Amino Protons. *Journal of the American Chemical Society* **117**: 11043–11048. doi: 10.1021/ja00150a001

Mulder FransAA, Spronk ChrisAEM, Slijper M, Kaptein R, Boelens R. 1996. Improved HSQC experiments for the observation of exchange broadened signals. *Journal of Biomolecular NMR* **8**: 223–228. doi: 10.1007/BF00211169

Piotto M, Saudek V, Sklenář V. 1992. Gradient-tailored excitation for single-quantum NMR spectroscopy of aqueous solutions. *Journal of Biomolecular NMR* **2**: 661–665. doi: 10.1007/BF02192855

Richter C, Reif B, Wörner K, Quant S, Marino JP, Engels JW, Griesinger C, Schwalbe H. 1998. A new experiment for the measurement of J(C,P) coupling constants including 3J(C4′i,Pi) and 3J(C4′i,Pi+1) in oligonucleotides. *Journal of Biomolecular NMR* **12**: 223–230. doi: 10.1023/A:1008258226683

Rinnenthal J, Richter C, Ferner J, Duchardt E, Schwalbe H. 2007. Quantitative Γ-HCNCH: determination of the glycosidic torsion angle χ in RNA oligonucleotides from the analysis of CH dipolar cross-correlated relaxation by solution NMR spectroscopy. *Journal of Biomolecular NMR* **39**: 17–29. doi: 10.1007/s10858-007-9167-5

Schulte-Herbrüggen T, Sørensen OW. 2000. Clean TROSY: Compensation for Relaxation-Induced Artifacts. *Journal of Magnetic Resonance* **144**: 123–128. doi: 10.1006/jmre.2000.2020

Schwalbe H, Marino JP, Glaser SJ, Griesinger C. 1995. Measurement of H,H-Coupling Constants Associated with .nu.1, .nu. 2, and .nu.3 in Uniformly 13C-Labeled RNA by HCC-TOCSY-CCH-E.COSY. *Journal of the American Chemical Society* **117**: 7251–7252. doi: 10.1021/ja00132a028

Schwalbe H, Samstag W, Engels JW, Bermel W, Griesinger C. 1993. Determination of 3J(C,P) and 3J(H,P) coupling constants in nucleotide oligomers with FIDS-HSQC. *Journal of Biomolecular NMR* **3**: 479–486. doi: 10.1007/BF00176013

Shaka AJ, Lee CJ, Pines A. 1988. Iterative schemes for bilinear operators; application to spin decoupling. *Journal of Magnetic Resonance (1969)* **77**: 274–293. doi: 10.1016/0022-2364(88)90178-3

Sklenář V. 1995. Suppression of Radiation Damping in Multidimensional NMR Experiments Using Magnetic Field Gradients. *Journal of Magnetic Resonance, Series A* **114**: 132–135. doi: 10.1006/jmra.1995.1119

Sklenář V, Bax A. 1987. Spin-echo water suppression for the generation of pure-phase two-dimensional NMR spectra. *Journal of Magnetic Resonance (1969)* **74**: 469–479. doi: 10.1016/0022-2364(87)90269-1

Sklenář V, Dieckmann T, Butcher SE, Feigon J. 1996. Through-bond correlation of imino and aromatic resonances in 13C-,15N-labeled RNA via heteronuclear TOCSY. *Journal of Biomolecular NMR* **7**: 83–87. doi: 10.1007/BF00190460

Sklenář V, Peterson RD, Rejante MR, Feigon J. 1993a. Two-and three-dimensional HCN experiments for correlating base and sugar resonances in 15N, 13C-labeled RNA oligonucleotides. *Journal of Biomolecular NMR* **3**: 721–727. doi: 10.1007/BF00198375

Sklenář V, Piotto M, Leppik R, Saudek V. 1993b. Gradient-Tailored Water Suppression for 1H-15N HSQC Experiments Optimized to Retain Full Sensitivity. *Journal of Magnetic Resonance, Series A* **102**: 241–245. doi: 10.1006/jmra.1993.1098

Solyom Z, Schwarten M, Geist L, Konrat R, Willbold D, Brutscher B. 2013. BEST-TROSY experiments for time-efficient sequential resonance assignment of large disordered proteins. *Journal of biomolecular NMR* **55**: 311–21. doi: 10.1007/s10858-013-9715-0

Vuister GW, Bax A. 1992. Resolution enhancement and spectral editing of uniformly 13C-enriched proteins by homonuclear broadband 13C decoupling. *Journal of Magnetic Resonance (1969)* **98**: 428–435. doi: 10.1016/0022-2364(92)90144-V

Zhang O, Kay LE, Olivier JP, Forman-Kay JD. 1994. Backbone 1H and 15N resonance assignments of the N-terminal SH3 domain of drk in folded and unfolded states using enhanced-sensitivity pulsed field gradient NMR techniques. *Journal of Biomolecular NMR* **4**: 845–858. doi: 10.1007/BF00398413
